# Supplementary material for: Preclinical platform for long-term evaluation of immuno-oncology drugs using hCD34+ humanized mouse model
Source: PubMed Central journal article supplement — J Immunother Cancer. 2020 Nov 25;8(2):e001513. doi: 10.1136/jitc-2020-001513 (PMC7689593; doi:10.1136/jitc-2020-001513), 2020-11-25
Supplement: jitc-2020-001513supp001.pdf [file jitc-2020-001513supp001.pdf]

1 **Supplementary tables**

Supplementary table 1. Primary antibodies used for flow cytometry

| <b>Antibody</b> | <b>Clone</b> | <b>Fluorescence</b> | <b>Company</b> |
|-----------------|--------------|---------------------|----------------|
| Human CD45      | HI30         | FITC                | e-Bioscience   |
| Mouse CD45      | 20-F11       | APC                 | e-Bioscience   |
| Human CD3       | BW264/56     | PE                  | e-Bioscience   |
| Human CD4       | SK-3         | PercP-eFluor710     | e-Bioscience   |
| Human CD8       | SK1          | APC                 | e-Bioscience   |
| Human CD56      | CMSSB        | APC-eFluor780       | e-Bioscience   |
| Human CD19      | SJ25C1       | PercP-eFluor710     | e-Bioscience   |
| Human PD-1      | MIH4         | PE                  | BD bioscience  |
| Ki67            | SoLA15       | PE                  | e-Bioscience   |

2

Supplementary table 2. Durability of humanized mouse model

| No. | Duration | Myeloablation | Reference                                               |
|-----|----------|---------------|---------------------------------------------------------|
| 1   | 24 week  | Irradiation   | Ishikawa et al., <i>Blood</i> , 2005;106:1565           |
| 2   | 13 week  | Irradiation   | Walcher et al., <i>Immun Inflamm Dis.</i> 2020;8:363    |
| 3   | 19 week  | Irradiation   | Verma et al., <i>Curr Protoc Pharmacol.</i> 2020;89:e77 |
| 4   | 20 week  | Irradiation   | Blumich, University of Zurich, 2020                     |
| 5   | 4 week   | Irradiation   | Tanaskovic et al., <i>Plos ONE</i> , 2019;14:e0217345   |
| 6   | 19 week  | Busulfan      | McCarthy et al., <i>JAIDS</i> , 2019;82:407             |

3

4

5

6

7

8

9

10

11

12

13

14

15

16 **Supplementary figures**

17 **Supplementary figure S1**

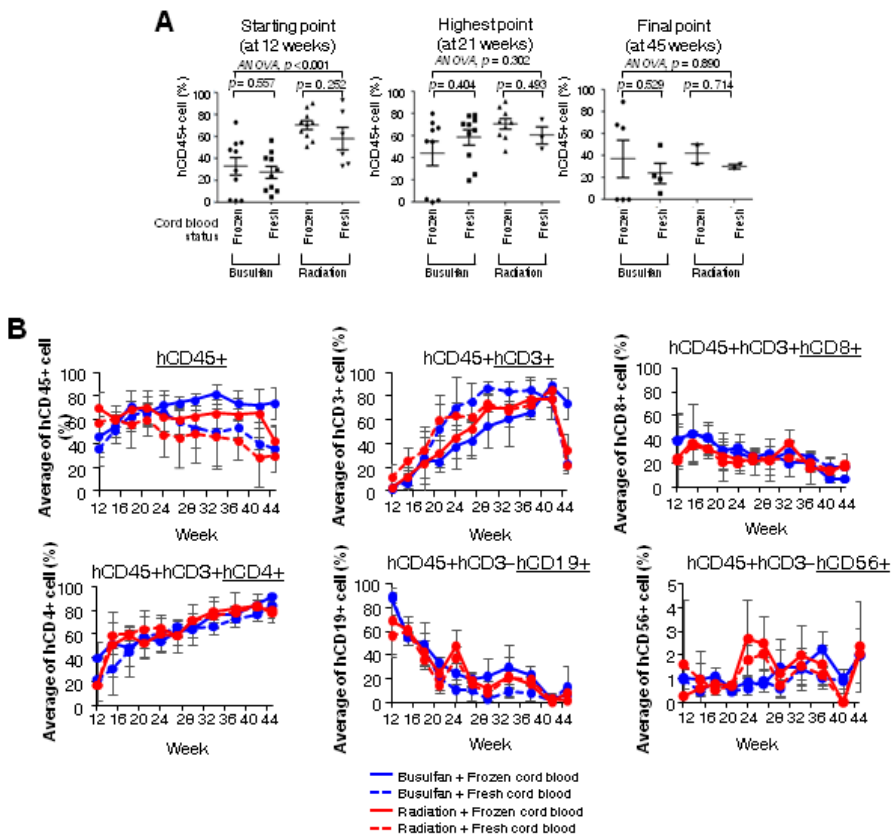

18  
19

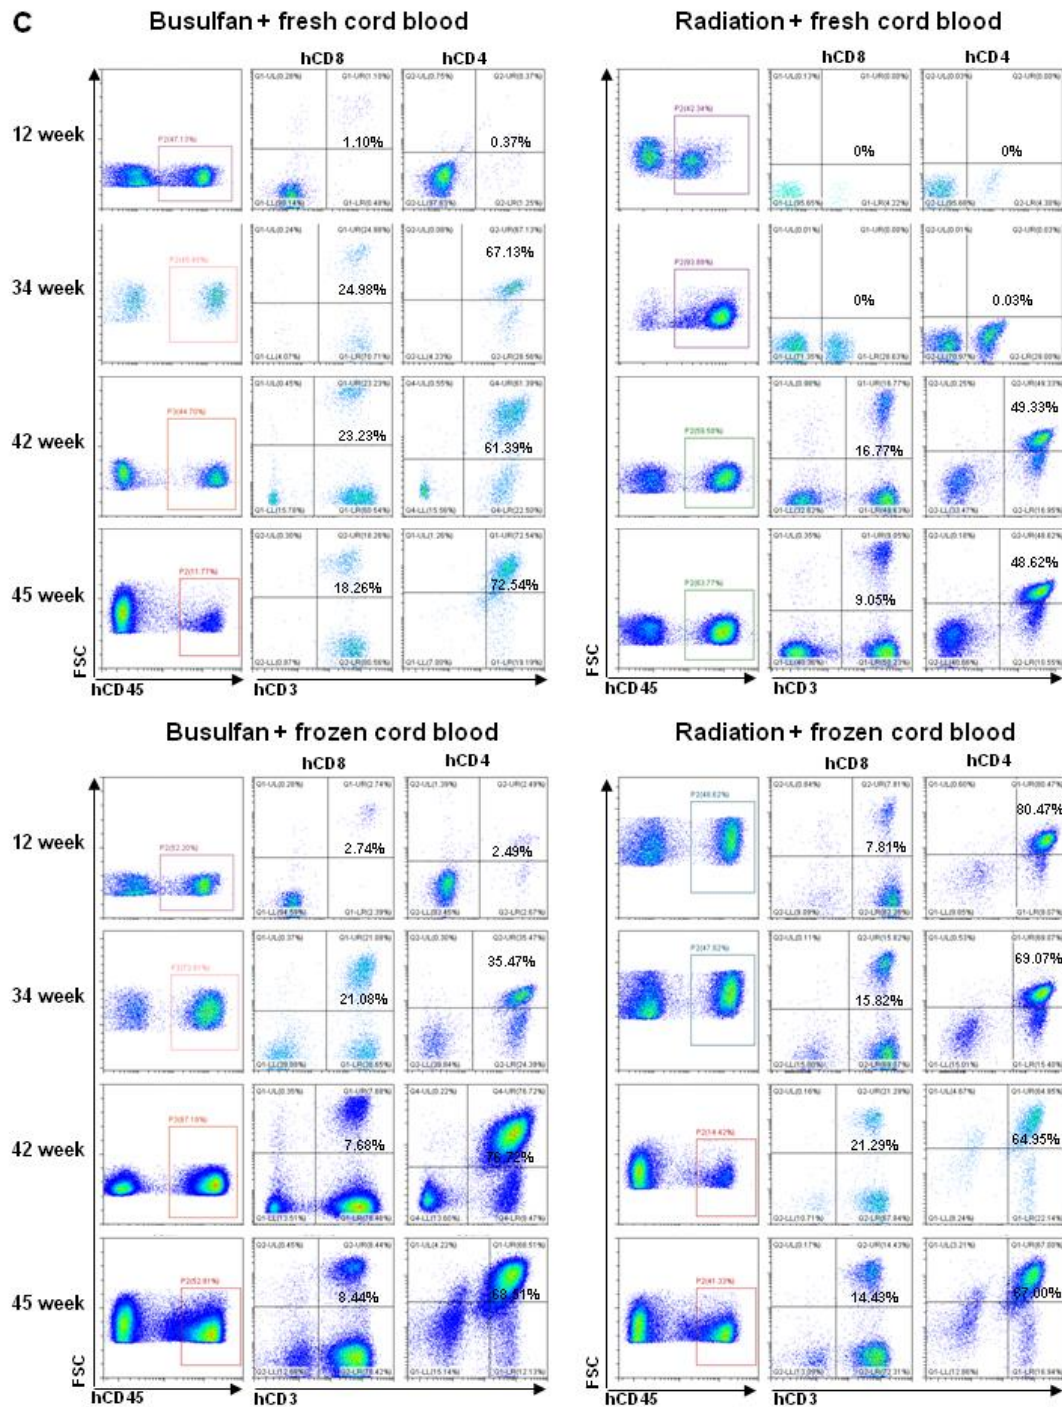

20

21 **Supplementary figure S1. Immune cell monitoring in humanized mice blood**

22 (A) The proportion of cells in the peripheral blood was analyzed for the humanization marker

23 hCD45+ by flow cytometry over 12 weeks to 45 weeks from the injection of hCD34+ HSCs.  
24 Percentages of hCD45+ cells were demonstrated at three time points (starting point, highest  
25 point, and final point) according to the myeloablative method and cord blood status.

26 (B) Various immune cell markers, including hCD45, hCD3, hCD4, hCD8, hCD19, and  
27 hCD56 in the peripheral blood were analyzed by flow cytometry over 12 weeks to 45 weeks  
28 from the injection of hCD34+ HSCs by myeloablative method and cord blood status. *P*-  
29 values were calculated by ANOVA test, and post-hoc *P*-values were calculated by LSD test.  
30 Data are presented as mean  $\pm$  standard deviation.

31 (C) Representative FACS plots of hCD3, hCD4, and hCD8 analyses according to the  
32 myeloablative method and cord blood status were shown. Those representative plots were  
33 selected at starting point (12 weeks), highest point (hCD3 and hCD4; 42 weeks, and hCD8;  
34 34 weeks), and final point (45 weeks).

35

## 36 Supplementary figure S2

Figure S2

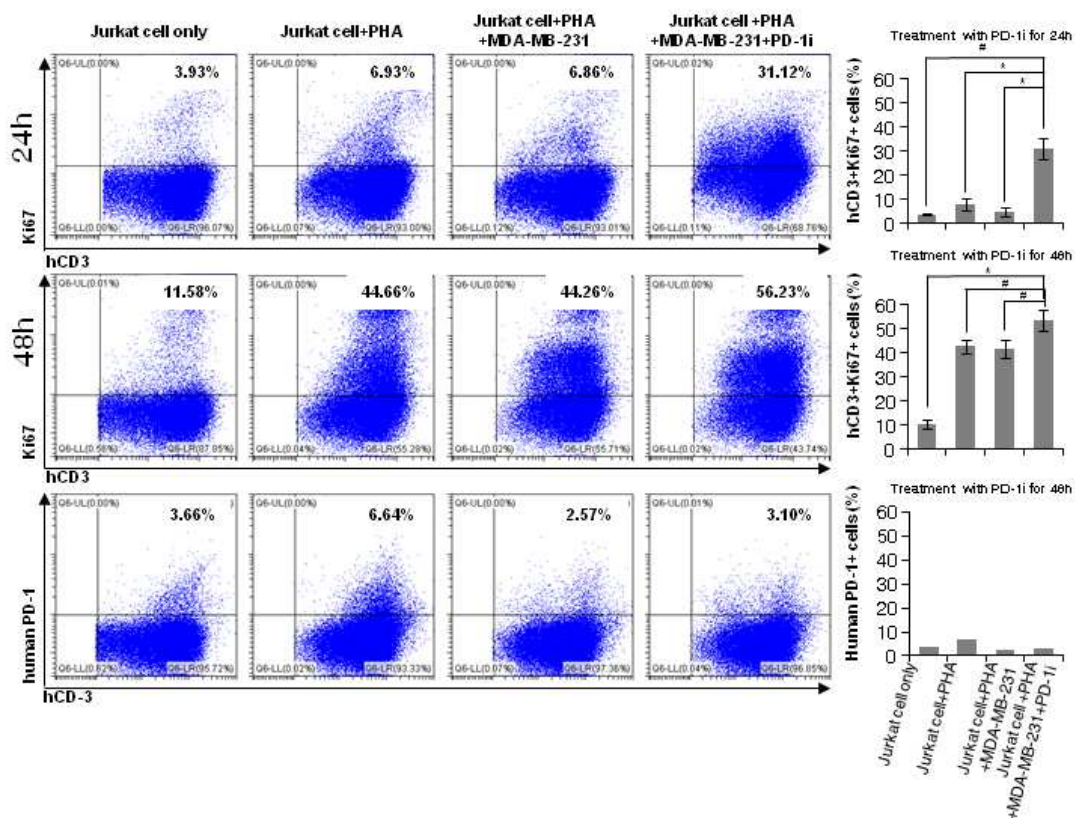

37

38 **Supplementary figure S2. Confirmation of inhibition efficiency of human PD-1 inhibitor**

39 The expressions of Ki67 or PD-1 on CD3+ Jurkat cells after PD-1 inhibitor treatment were  
 40 analyzed by flow cytometry. Representative flow cytometry plots from incubation of hCD3+  
 41 Jurkat cells with T cell activator PHA, MDA-MB-231 cells, or PD-1 inhibitor for 24 h and 48  
 42 h are shown. *P*-values were calculated by Student's *t*-test (\**p*<0.05 and #*p*>0.05). Data are  
 43 presented as mean ± standard deviation.

44



## 45 Supplementary figure S3

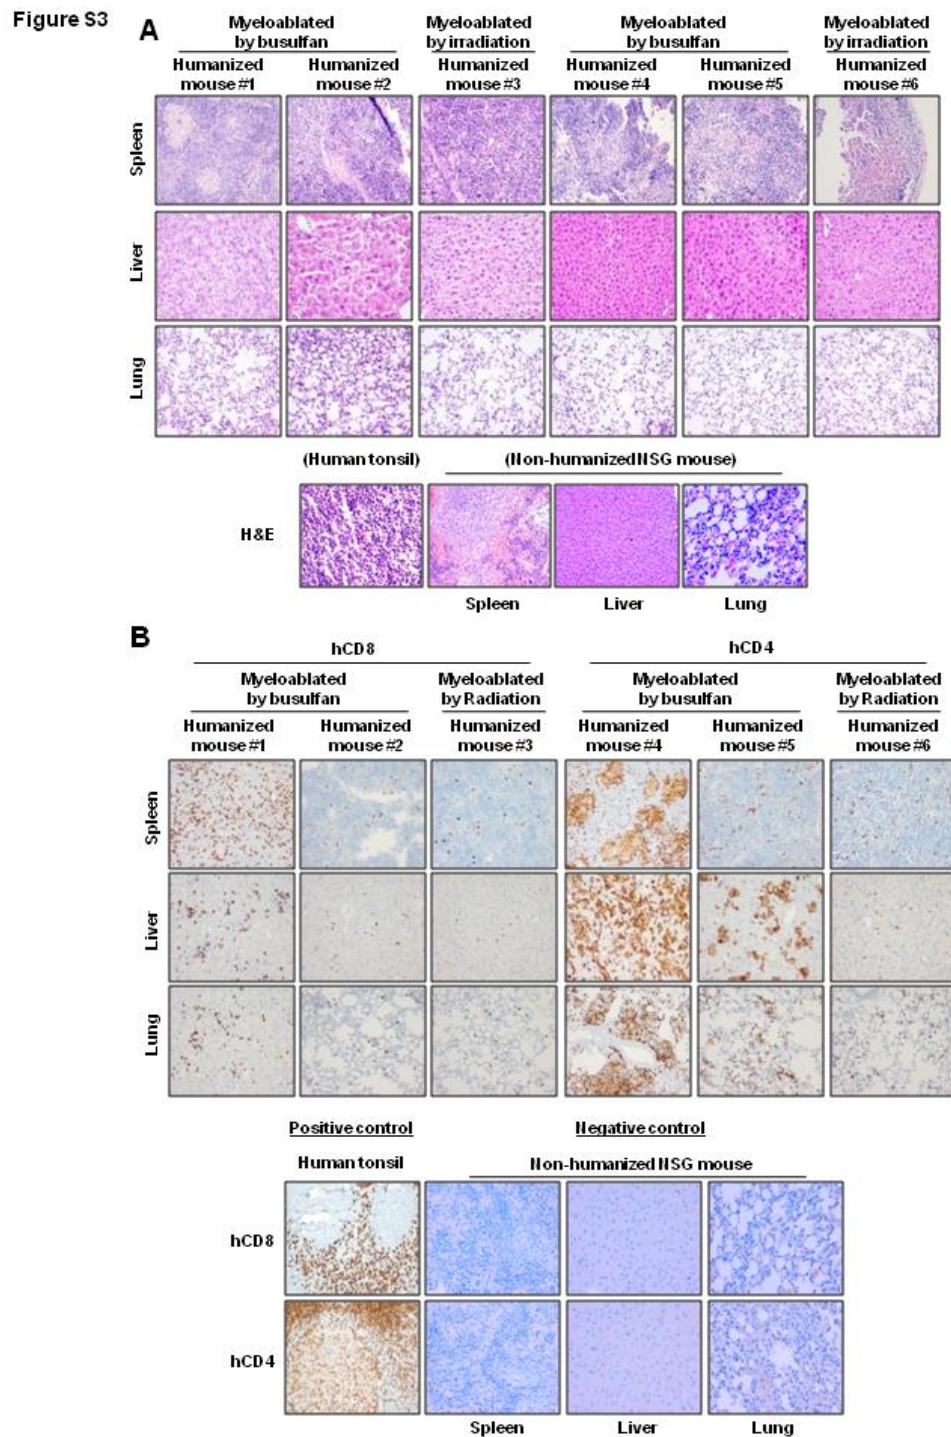

46

47 Supplementary figure S3. H&amp;E staining and IHC staining for hCD4+ and hCD8+ T

48 **cells**

49 H&E (A) and IHC staining for hCD4+ and hCD8+ T cells (B), using normal organs such as  
50 spleens, livers, and lungs, collected from 45-week humanized mice with MDA-MB-231  
51 xenograft. At 43 days post-implantation of MDA-MB-231 cells, mice were sacrificed and  
52 normal organs were collected from those mice. IHC images were displayed by myeloablative  
53 method. **The human tonsil was used for positive control, and tumor tissue and organs (spleen,**  
54 **liver, and lung) from non-humanized mouse was used for negative control.** Scale bars, 5 mm.  
55 Images were photographed at ×400 magnification. In humanized mouse #1 #2 and #3, frozen  
56 cord blood was used as a HSC source; In humanized mouse #4, #5, and #6 fresh cord blood  
57 was used as a HSC source.

58

59

60

61

62

63

64

65

66

67



68 Supplementary figure S4

Figure S4

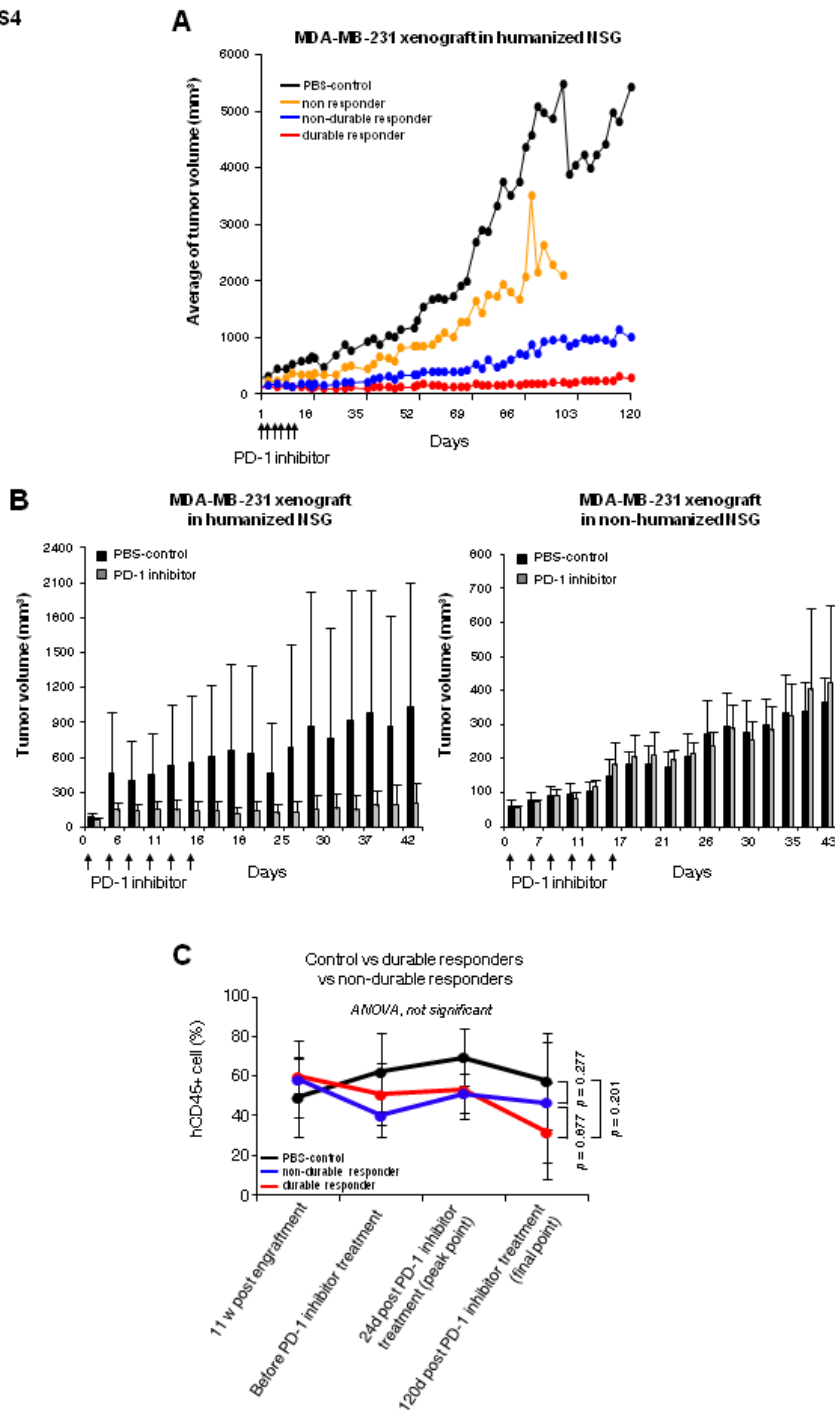

69

70

71 **Supplementary figure S4. *In vivo* efficacy test of PD-1 inhibitor in MDA-MB-231**  
72 **xenografted humanized mice**

73 (A) In the 17 humanized mice with MDA-MB-231 xenograft, 5 mice were PBS- treatment  
74 control and 12 mice received PD-1 inhibitor. Eleven of 12 mice treated with PD-1 inhibitor,  
75 showed response. In 8 of 11 responders, response was durably sustained up to 120 days (i.e.,  
76 durable responder), whereas in 3 of 11 responders, tumors started to grow again from around  
77 day 35 (i.e., non-durable responder). One case did not respond to PD-1 inhibitor (i.e., non-  
78 responder).

79 (B) Comparison of results of PD-1 inhibitor efficacy tests in our humanized versus non-  
80 humanized NSG mice. Paired bar graphs (black and gray bars) indicated average tumor sizes  
81 in the PBS-control (gray bar) and PD-1 inhibitor treatment (black bar) groups at the same  
82 time point. In the humanized mice, PD-1 inhibitor treatment group showed tumor growth halt  
83 unlikely the PBS-control group showing progressive tumor growth by time, whereas, in non-  
84 humanized mice, similar pattern of progressive tumor growth was seen in both PBS-control  
85 and PD-1 inhibitor treatment groups. Data are presented as mean  $\pm$  standard deviation.

86 (C) Comparison of hCD45+ cells in the peripheral blood based on response durability to PD-  
87 1 inhibitor in humanized mice. The levels of hCD45+ cells at indicated time points [11w post  
88 engraftment with hCD34+ HSCs, before PD-1 inhibitor treatment, 24 days post PD-1  
89 inhibitor treatment (peak point), and 120 days post PD-1 inhibitor treatment (final point)]  
90 were represented. *P*-values were calculated at indicated time points by ANOVA with post hoc  
91 LSD test. At all time points, *P*-values were not significant but only *P*-values at the final time  
92 point were marked in the graph. Data are presented as mean  $\pm$  standard deviation.

93

94 **Supplementary methods**

95 ***Cell lines***

96 The MDA-MB-231 human breast cancer cell line was purchased from the American Type  
97 Culture Collection (ATCC, VA, USA #HTB-26). The cells were maintained in Roswell Park  
98 Memorial Institute (RPMI) 1640 medium and supplemented with 10% fetal bovine serum  
99 (FBS) and 1% penicillin/streptomycin, and were incubated at 37°C, 5% CO<sub>2</sub> in an incubator.

100 ***Hematoxylin & eosin (H&E) staining and immunohistochemistry (IHC)***

101 Immune cell infiltration in the tumor was determined by IHC using 4% paraformaldehyde-  
102 fixed, paraffin-embedded tissues. All paraffin sections were cut at a 3 µm thickness,  
103 deparaffinized through xylene, and dehydrated with graded ethanol. For H&E staining, slides  
104 were stained with Harris hematoxylin solution and eosin Y solution. For IHC analysis, heat-  
105 induced antigen retrieval with 0.01 M citrate buffer (pH 6.0) was used for indicated  
106 antibodies. Endogenous peroxidase activity was blocked with 3% H<sub>2</sub>O<sub>2</sub> in methanol, and  
107 primary incubations were performed with human CD8 (1:500) or CD4 (1:500) antibody  
108 (Abcam, MA, USA) overnight (4°C). Subsequently, sections were incubated with secondary  
109 antibody (HRP-conjugated) for 1 h at room temperature, visualized with 3,3-  
110 diaminobenzadine tetrahydro-chloride (DAB; Thermo fisher Scientific, USA) for  
111 chromogenic development, washed, and counterstained with hematoxylin. The slides were  
112 dehydrated with graded ethanol and mounted with Canada balsam (Junsei, Japan). For  
113 quantification of IHC staining, positively stained cells were counted in five random ×400  
114 microscopic fields for each tissue section. A total of five different sections were counted and  
115 the average percentage with standard deviation of positive cells per section is shown.

116

117 ***TUNEL assay***

118 Paraffin-embedded tissue sections were cut at a 3- $\mu$ m thickness, deparaffinized through  
119 xylene, and dehydrated with graded ethanol. Multiple sections were stained using the  
120 Apoptag Plus Peroxidase In Situ Apoptosis Detection Kit (EMD Millipore Corp, CA, USA).  
121 Slides were treated with proteinase K for 15 min at room temperature, and TdT for 1 h at  
122 37°C. The slides were incubated with an anti-dioxigenin-peroxidase secondary substrate at  
123 room temperature and 37°C, and slides were counterstained with hematoxylin. The slides  
124 were dehydrated with graded ethanol and mounted with Canada balsam (Junsei, Japan). For  
125 quantification of IHC staining, positively stained cells were counted in five random  $\times$ 400  
126 microscopic fields for each tissue section. A total of five different fields were counted and the  
127 average percentage of positive cells per section with standard deviation is shown.

128 ***In vitro T cells proliferation assay***

129 MDA-MB-231 cells ( $1.5 \times 10^5$  cells/well) were seeded in 6 well plates. Next day, Jurkat cells  
130 ( $1.5 \times 10^5$  cells/well) were co-cultured with MDA-MB-231 cells by adding T cell stimulator,  
131 10  $\mu$ g/ml of phytohemagglutinin (PHA) in the media. Then, those cells were treated with the  
132 human PD-1 inhibitor for 24 and 48 h. Suspended cells were collected and stained with  
133 indicated antibodies. Stained cells were analyzed by flow cytometry.

134
